# Supplementary material for: Improving the bioactivity and mechanical properties of poly(ethylene glycol)-based hydrogels through a supramolecular support network
Source: Royal Society of Chemistry journal article supplement (doi:10.1039/d4tb02002b), 2024-12-27
Supplement: d4tb02002b1.pdf [file d4tb02002b1.pdf]

### Supplementary Information for

Improving the bioactivity and mechanical properties of poly(ethylene glycol)-based hydrogels through a supramolecular support network

Yuzhu Liu<sup>1</sup>, Md Shariful Islam<sup>1</sup>, Anna Bakker<sup>2</sup>, Zihao Li<sup>3</sup>, Alaa Ajam<sup>2</sup>,  
Jamie J. Kruzic<sup>2</sup>, Kristopher A. Kilian<sup>1,3</sup>

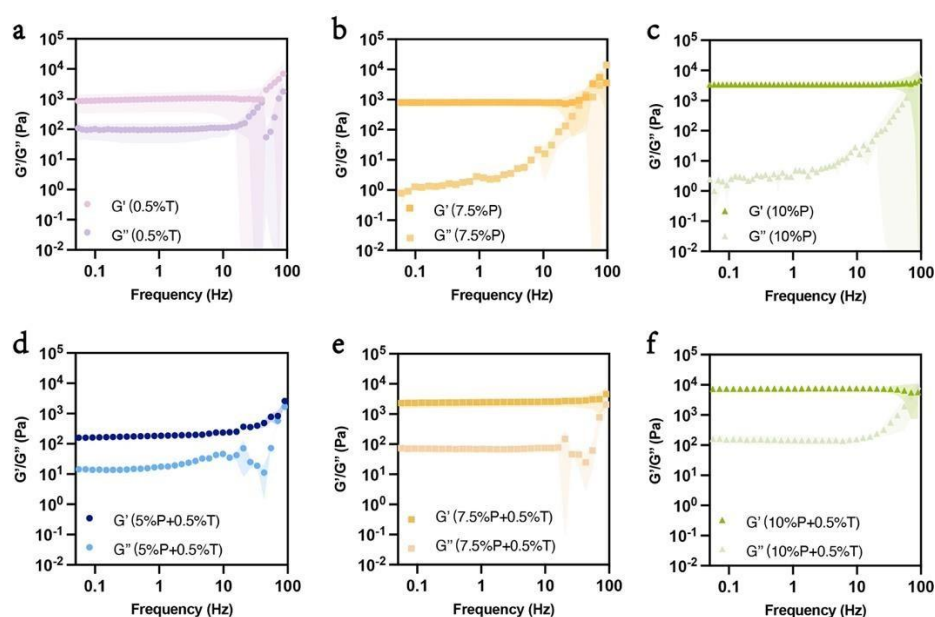

**Figure S1.** Rheological Analysis of PEGDM/Trpzp Hydrogels. **(a-c)** Frequency sweep measurements of the storage ( $G'$ ) and loss modulus ( $G''$ ) for hydrogels composed of 0.5% (w/v) Trpzp, 7.5% (w/v) PEGDM, and 10% (w/v) PEGDM, showing the response to increasing strain. **(d-f)** Frequency sweep measurements of the storage ( $G'$ ) and loss modulus ( $G''$ ) for hybrid hydrogels with 5%, 7.5%, and 10% (w/v) PEGDM combined with 0.5% (w/v) Trpzp indicating the influence of Trpzp on the mechanical behavior and frequency tolerance of the PEGDM network. All tests were performed in triplicate ( $n=3$ ).

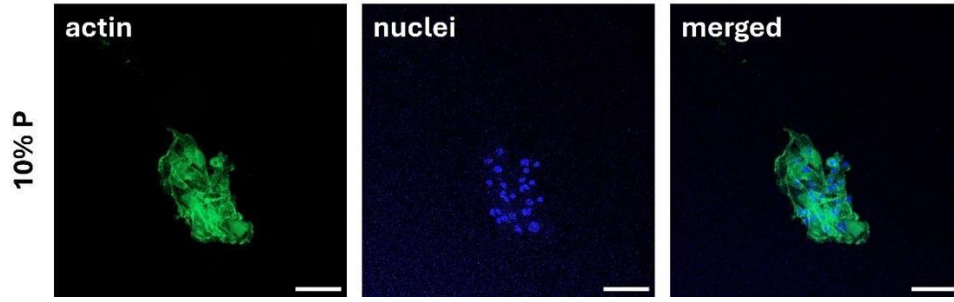

**Figure S2.** Morphology and Quantitative Analysis of ADSCs Cultured on PEGDM Hydrogels After 2 Days. Confocal microscopy images of adiposederived stem cells (ADSCs) cultured on 10% (w/v) PEGDM hydrogel formulations stained for nuclei (blue, DAPI) and actin (green, phalloidin) after 2 days. Scale bar: 100  $\mu\text{m}$ .

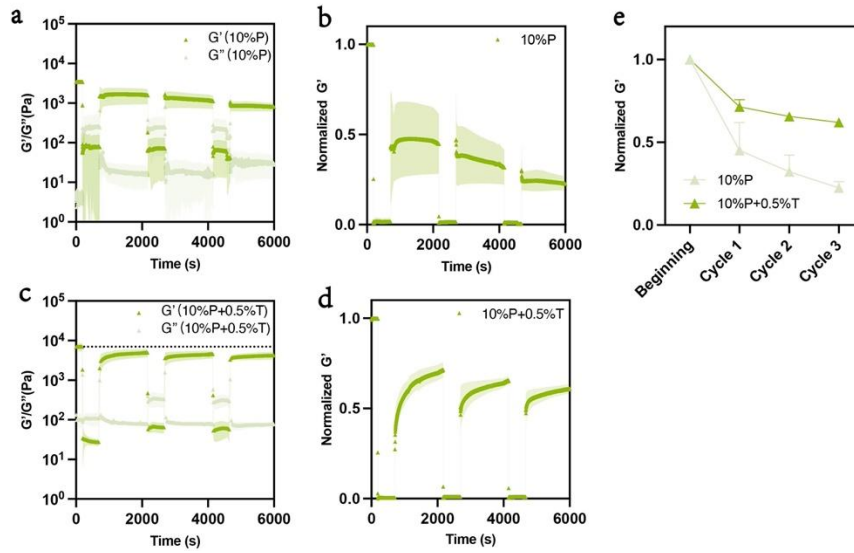

**Figure S3.** Self-healing properties of PEGDM/Trpzp hydrogel. **(a)** and **(c)** are thixotropic measurements of storage modulus ( $G'$ ) and loss modulus ( $G''$ ) of 10% (w/v) PEGDM and 10%PEGDM/ 0.5% (w/v) Trpzp hydrogels. Their normalized storage modulus ( $G'$ ) changes are shown in **(b)** and **(d)**. **(e)** The changes of the normalized mean value of storage modulus ( $G'$ ) in each cycle of 10% (w/v) PEGDM and 10%PEGDM/ 0.5% (w/v) Trpzp hydrogels. All tests were performed in triplicate ( $n=3$ )



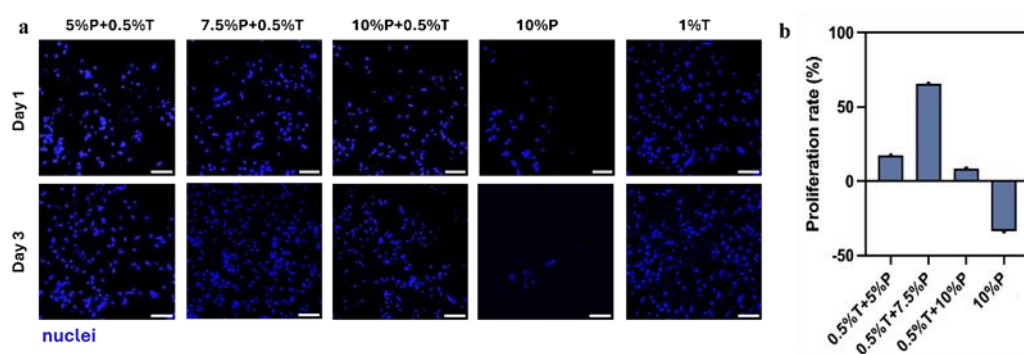

**Figure S6.** Cell proliferation of ADSCs Cultured on PEGDM/Trpzip Hydrogels After 1 and 3 Days. **(a)** Confocal microscopy images of adipose-derived stem cells (ADSCs) cultured on various hydrogel formulations stained for nuclei (blue, DAPI) after 1 and 3 days. The different hydrogel formulations include 0.5% (w/v) Trpzip, 5% PEGDM + 0.5% Trpzip, 7.5% PEGDM + 0.5% Trpzip, and 10% PEGDM + 0.5% Trpzip. Scale bar: 100  $\mu$ m. **(b)** The proliferation rate of each hydrogel comparing from Day 1 and Day 3 culturing.
